# Supplementary material for: 3D Electrospun Polycaprolactone Scaffolds to Assess Human Periodontal Ligament Cells Mechanobiological Behaviour
Source: MDPI journal article supplement (doi:10.3390/biomimetics8010108), 2023-03-07
Supplement: s1 [file s1]

## Supplementary materials

*Table S1: Absolute stiffness (in  $10^{-3} \text{ N} \cdot \mu\text{m}^{-1}$ ) values for all the samples at day 0 and day 21 for the three different series. The subscripts 1, 2 and 3 correspond to the 3 samples in each series. Samples from the same column (with the same name and subscript) are not associated. NS-Stat : Non-seeded static scaffolds.*

| Series          | K ( $10^{-3} \text{ N} \cdot \mu\text{m}^{-1}$ ) | NS-Stat <sub>1</sub> | NS-Stat <sub>2</sub> | NS-Stat <sub>3</sub> | Stat <sub>1</sub> | Stat <sub>2</sub> | Stat <sub>3</sub> | Dyn <sub>1</sub> | Dyn <sub>2</sub> | Dyn <sub>3</sub> |
|-----------------|--------------------------------------------------|----------------------|----------------------|----------------------|-------------------|-------------------|-------------------|------------------|------------------|------------------|
| 1 <sup>st</sup> | d <sub>0</sub>                                   | 9.1                  | 9.0                  | 7.7                  | 5.7               | 6.8               | 7.9               | 6.6              | 14.3             | 9.2              |
|                 | d <sub>21</sub>                                  | 7.3                  | 8.9                  | 7.3                  | 2.3               | 4.5               | 5.0               | 4.1              | 9.3              | 4.7              |
| 2 <sup>nd</sup> | d <sub>0</sub>                                   | 1.9                  | 2.4                  | 1.8                  | 3.5               | 1.9               | 2.8               | 1.2              | 7.4              | 2.1              |
|                 | d <sub>21</sub>                                  | 1.5                  | 1.6                  | 2.0                  | 1.0               | 1.2               | 2.3               | 0.9              | 3.1              | 2.0              |
| 3 <sup>rd</sup> | d <sub>0</sub>                                   | 5.3                  | 3.9                  | 6.2                  | 6.8               | 7.3               | 10.6              | 7.9              | 7.9              | 6.8              |
|                 | d <sub>21</sub>                                  | 4.9                  | 6.2                  | 5.8                  | 4.6               | 7.1               | 6.6               | 4.7              | 3.9              | 3.9              |

*Table S2: Mean and standard deviation (SD) of the ALP activity measured on the triplicate for each condition and timestep.*

| ALP activity ( $\text{U} \cdot 10^{-5} / \text{day}$ ) |      | Day 10 |      | Day 21 |      |
|--------------------------------------------------------|------|--------|------|--------|------|
|                                                        |      | Stat   | Dyn  | Stat   | Dyn  |
| 1 <sup>st</sup> series                                 | Mean | 0.31   | 3.77 | 1.71   | 1.89 |
|                                                        | SD   | 0.16   | 2.68 | 0.59   | 0.66 |
| 2 <sup>nd</sup> series                                 | Mean | 0.51   | 1.82 | 2.03   | 0.51 |
|                                                        | SD   | 0.70   | 0.78 | 0.23   | 0.09 |
| 3 <sup>rd</sup> series                                 | Mean | 0.59   | 0.53 | 0.51   | 0.86 |
|                                                        | SD   | 0.03   | 0.01 | 0.01   | 0.01 |

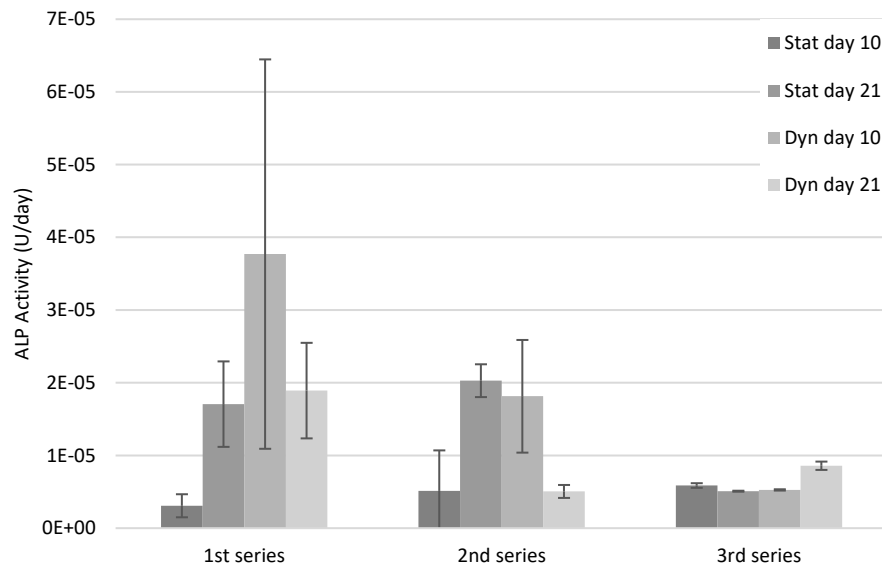

*Figure S1: Bar charts of ALP activity averaged values and SD for the two conditions, the two time-steps, and the three experimental series*

Table S3: Mean and standard deviation (SD) of the mass of IL-6 measured on the triplicate for each condition and timestep.

| mass IL-6 (pg/day)     |      | Day 10 |      | Day 21 |     |
|------------------------|------|--------|------|--------|-----|
|                        |      | Stat   | Dyn  | Stat   | Dyn |
| 1 <sup>st</sup> series | Mean | 15.9   | 15.9 | 48.1   | 8.2 |
|                        | SD   | 1.8    | 3.8  | 6.1    | 1.2 |
| 2 <sup>nd</sup> series | Mean | 9.7    | 12.4 | 9.9    | 2.3 |
|                        | SD   | 1.8    | 3.5  | 1.4    | 0   |
| 3 <sup>rd</sup> series | Mean | 2.9    | 3.2  | 66.2   | 3.6 |
|                        | SD   | 0.7    | 2.4  | 2.7    | 1.2 |

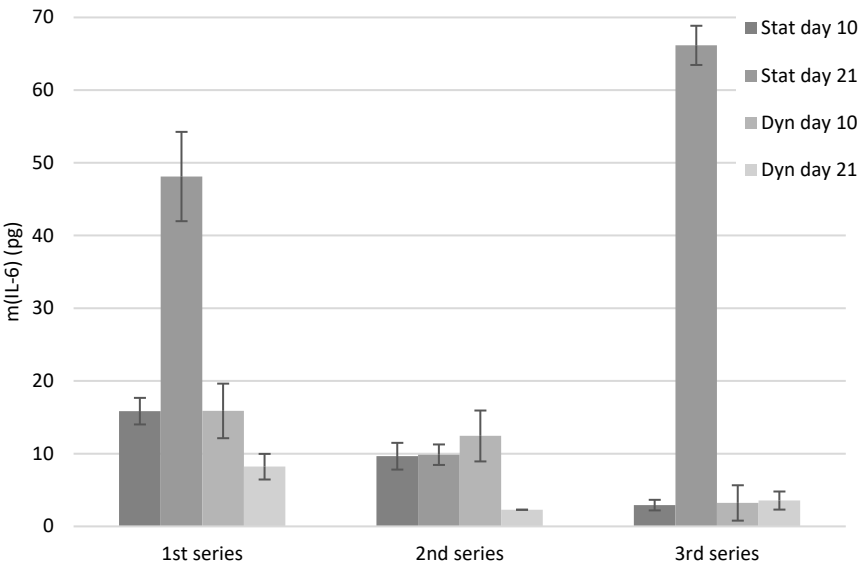

Figure S2: Bar charts of mass of IL-6 averaged values and SD for the two conditions, the two time-steps, and the three experimental series
